# Supplementary material
Source: PubMed Central journal article supplement (PMC187908)

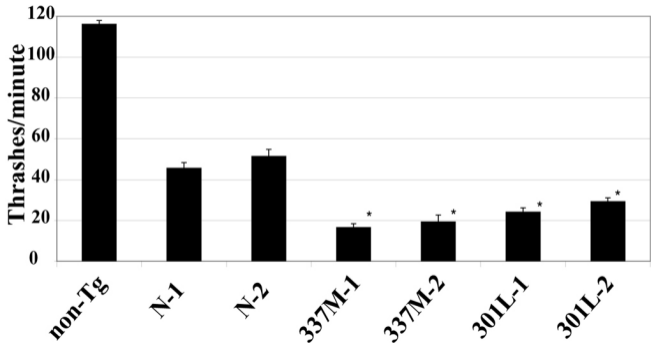

Supplement: pnas_100_17_9980__2.pdf [file pnas_100_17_9980__2.pdf]

**A**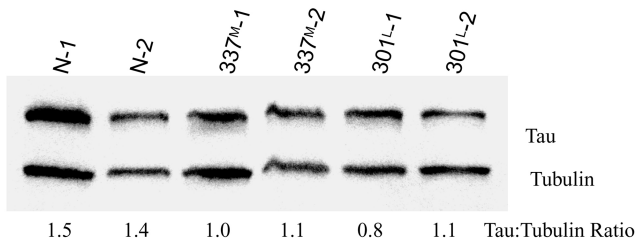**B****Titration of Transgene Copy Number**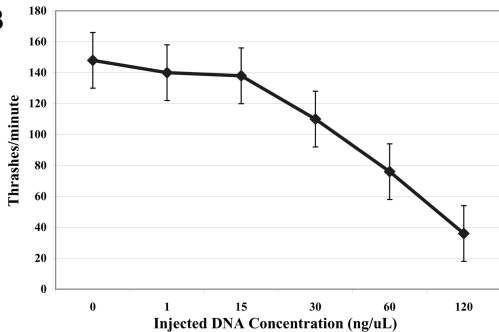

Supplement: pnas_100_17_9980__4.pdf [file pnas_100_17_9980__4.pdf]

Marker Only

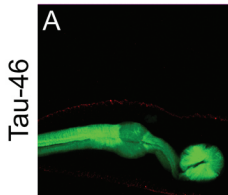

**B**

N-1

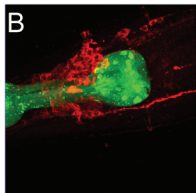

**C**

337<sup>M</sup>-1

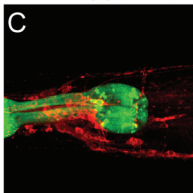

**D**

301<sup>L</sup>-1

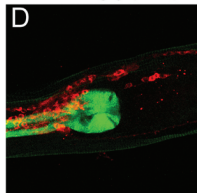

**E**

PHF-1

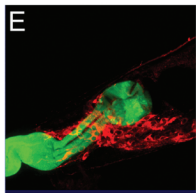

**F**

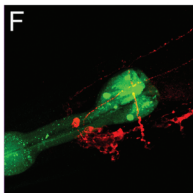

**G**

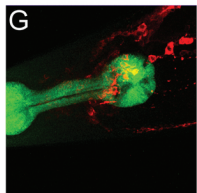

Supplement: pnas_100_17_9980__6.pdf [file pnas_100_17_9980__6.pdf]

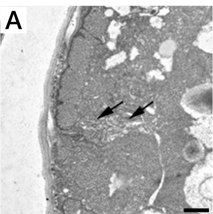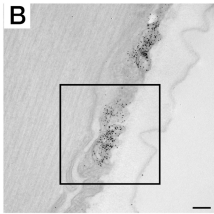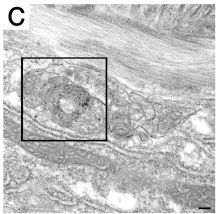

Supplement: pnas_100_17_9980__8.pdf [file pnas_100_17_9980__8.pdf]
